# Supplementary material for: The Role of PGE2 in Alveolar Epithelial and Lung Microvascular Endothelial Crosstalk
Source: Springer Nature journal article supplement (doi:10.1038/s41598-017-08228-y), 2017-08-07
Supplement: MOESM1 [file 41598_2017_8228_MOESM1_ESM.pdf]

# Supplementary Material

## The Role of PGE<sub>2</sub> in Alveolar Epithelial and Lung Microvascular Endothelial Crosstalk

Thomas Bärnthaler<sup>1</sup>, Jovana Maric<sup>1</sup>, Wolfgang Platzer<sup>1</sup>, Viktoria Konya<sup>1</sup>, Anna Theiler<sup>1</sup>,  
Carina Hasenöhr<sup>1</sup>, Benjamin Gottschalk<sup>2</sup>, Sandra Trautmann<sup>4</sup>, Yannick Schreiber<sup>5</sup>,  
Wolfgang F. Graier<sup>2</sup>, Rudolf Schicho<sup>1</sup>, Gunther Marsche<sup>1</sup>, Andrea Olschewski<sup>3</sup>, Dominique  
Thomas<sup>4</sup>, Rufina Schuligoi<sup>1</sup>, Akos Heinemann<sup>1</sup>

<sup>1</sup>Institute of Experimental and Clinical Pharmacology, Medical University of Graz

<sup>2</sup>Institute of Molecular Biology and Biochemistry, Medical University of Graz

<sup>3</sup>Ludwig Boltzmann Institute Lung Vascular Research, Graz, Austria

<sup>4</sup>Pharmazentrum Frankfurt/ZAFES Institute of Clinical Pharmacology, Goethe-University  
Frankfurt

<sup>5</sup> Fraunhofer Institute for Molecular Biology and Applied Ecology IME, Project Group TMP,  
Frankfurt, Germany

**Content:**

- **Supplementary figures**

- **Fig S1.** *Primary mouse ATI-like cells express COX-1.*
- **Fig S2.** *Cells isolated from murine lungs and cultured for 6 days on laminin 1 express AQP5*
- **Fig S3.** *Conditioned medium (CM) from isolated mouse ATI-like cells increases endothelial barrier function independent of IP receptor activation*
- **Fig S4.** *LPA does not alter endothelial barrier function.*

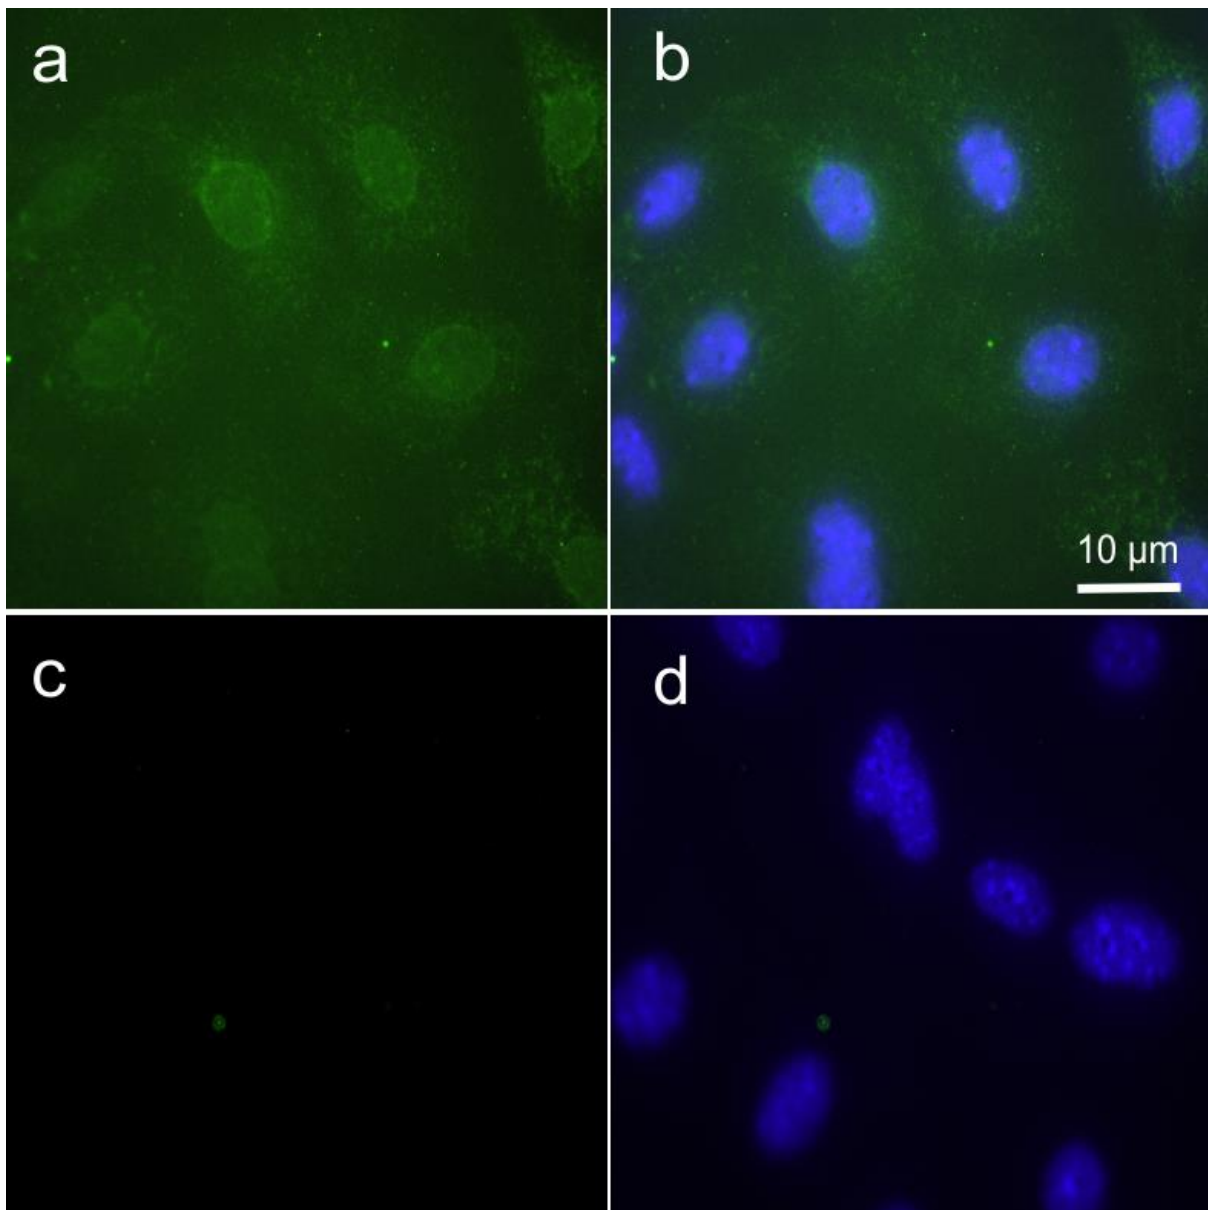

**Fig S1.** *Primary mouse ATI-like cells express COX-1.* Cells grown in chamber slides for 6 days were stained with an antibody directed against (a) COX-1 (green) (c) or a matching

*isotype control. Samples were counterstained with DAPI to reveal localization of nuclei; b and d shows the overlay. Images are representative for 5 independent experiments.*

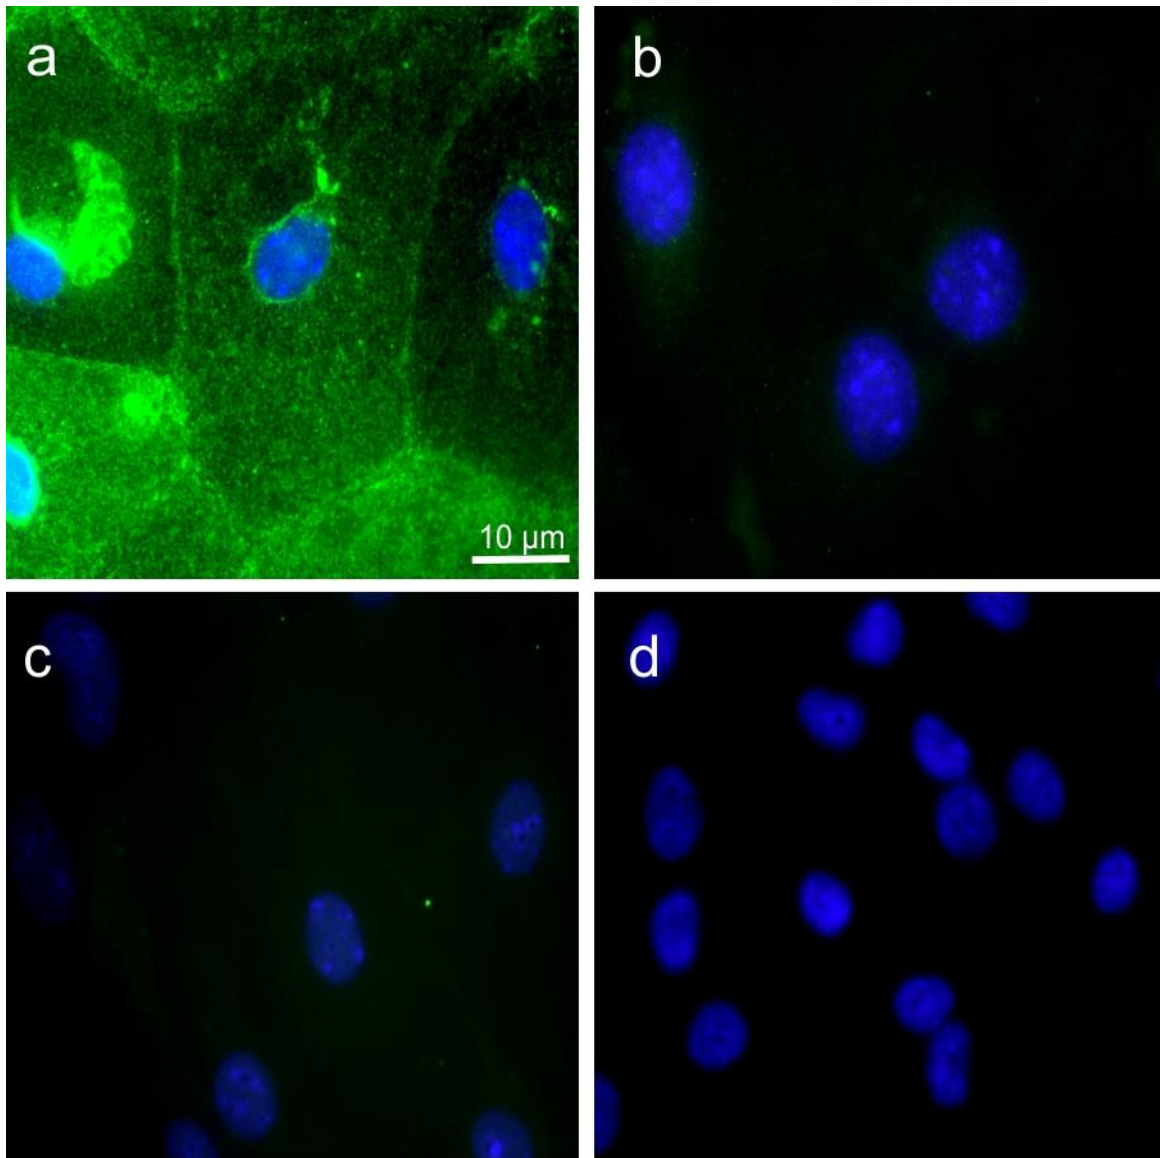

**Fig S2.** *Cells isolated from murine lungs and cultured for 6 days on laminin 1 express AQP5. a shows AQP5-positive isolated murine ATI-like cells. Controls included (b) pre-incubation of antibody with blocking peptide, (c) incubation of cells with a matching isotype control and (d) a negative control using murine endothelial cells. Images are representative for 5 independent experiments.*

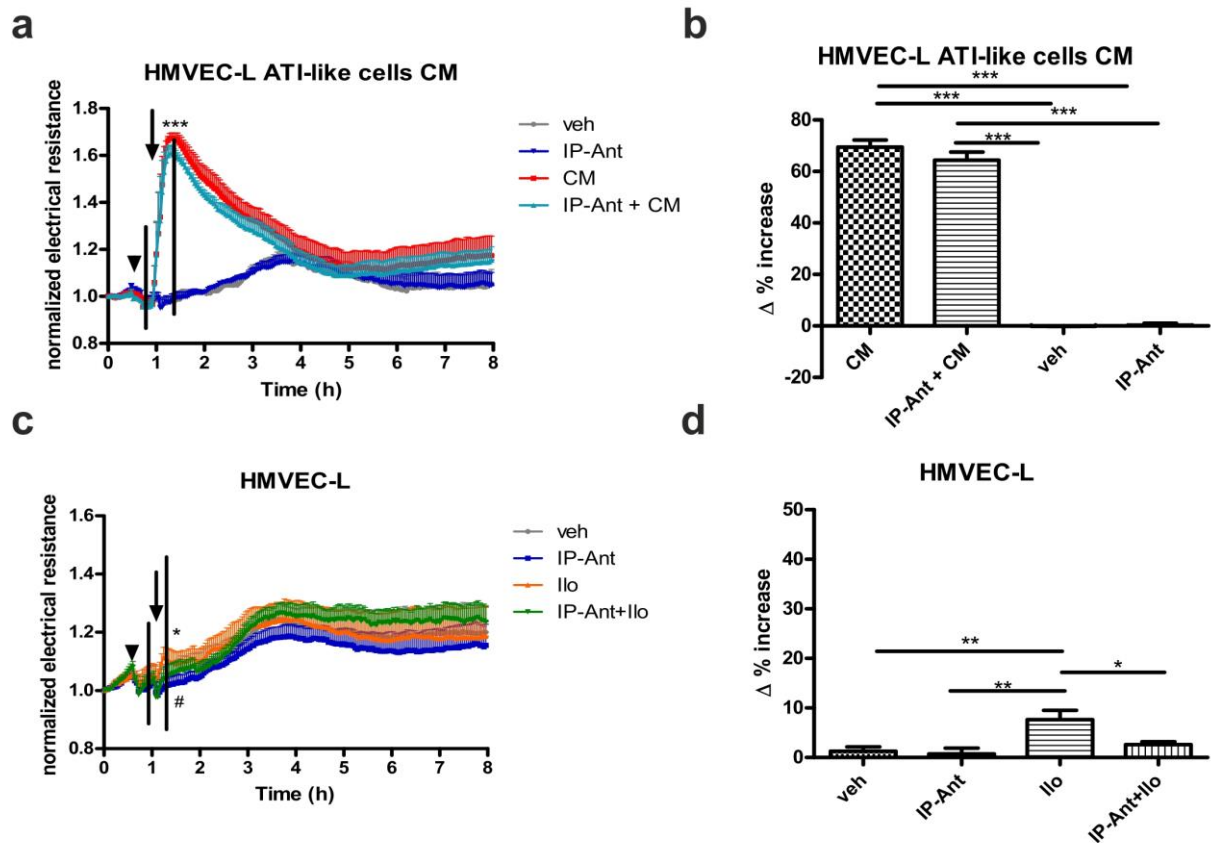

**Fig S3. Conditioned medium (CM) from isolated mouse ATI-like cells increases endothelial barrier function independent of IP receptor activation.** (a, c) HMVEC-L were grown on gold microelectrodes and were pretreated (arrowhead) with vehicle (Veh), or the IP antagonist Cay10441 (IP-Ant; 1  $\mu$ M). (a) CM from ATI-like cells or (c) iloprost (Ilo; 500 nM) were added (indicated by arrow). To detect differences in barrier function (measured as change in resistance),  $\Delta\%$  values were calculated. The black lines mark the time points which were used to calculate  $\Delta\%$  increase shown in (b, d). a, c: Data show mean normalized resistance + SEMs; b, d:  $\Delta\%$  increase was calculated by subtracting normalized resistance of the first time point marked in a and c from the second time point, and multiplying the value with 100. Statistical analysis was performed using two-way ANOVA and Tukey's multiple comparison test for a and one-way ANOVA followed by Bonferroni's post hoc test for b; n=4, \*  $p < 0.05$ ; \*\*  $p < 0.01$ ; \*\*\*  $p < 0.001$ ; \* vs vehicle; # antagonist + iloprost vs iloprost alone.

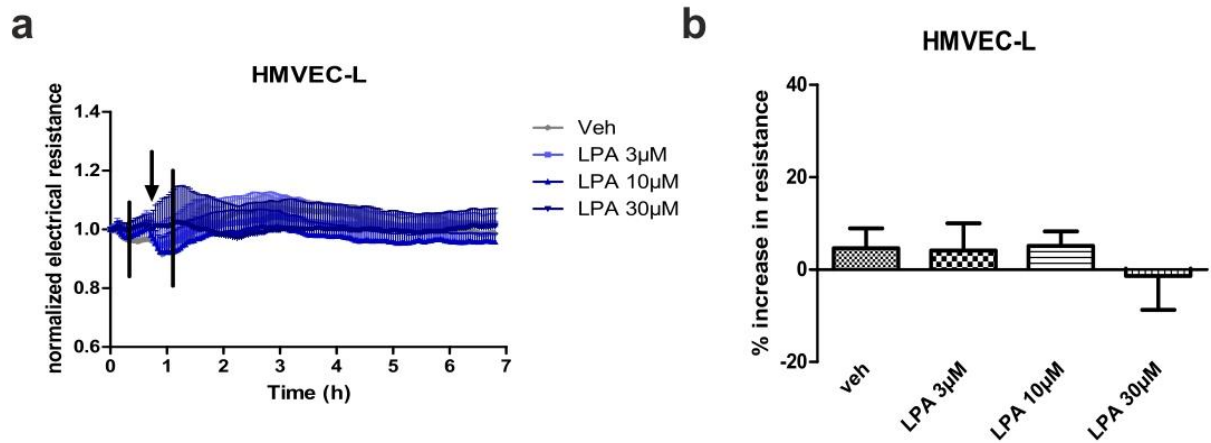

**Fig S4. LPA does not alter endothelial barrier function.** HMVEC-L were grown on gold microelectrodes and were treated with vehicle or increasing concentrations of lysophosphatidic acid (LPA) (arrow). To detect differences in barrier function (measured as change in resistance),  $\Delta\%$  values were calculated. The black lines mark the time points which were used to calculate  $\Delta\%$  increase shown in (b). **a**: Data show mean normalized resistance + SEMs; **b**:  $\Delta\%$  increase was calculated by subtracting normalized resistance of the first time point marked in **a** from the second time point, and multiplying the value with 100. Statistical analysis was performed using two-way ANOVA and Tukey's multiple comparison test for **a** and one-way ANOVA followed by Bonferroni's post hoc test for **b**;  $n=3$ . Significance was not detected.
